# Supplementary material
Source: PubMed Central journal article supplement (PMC9912165)
Supplement: jamaoncol-e227605-s003.pdf [file jamaoncol-e227605-s003.pdf]

## Data Sharing Statement

Bornhäuser. Allogeneic Hematopoietic Cell Transplantation vs Standard Consolidation Chemotherapy in Patients With Intermediate-Risk Acute Myeloid Leukemia. *JAMA Oncol.* Published February 09, 2023. doi:10.1001/jamaoncol.2022.7605

### Data

**Data available:** Yes

**Data types:** Deidentified participant data

**How to access data:** [martin.bornhaeuser@ukdd.de](mailto:martin.bornhaeuser@ukdd.de)

**When available:** With publication

### Supporting Documents

**Document types:** None

### Additional Information

**Who can access the data:** researchers who propose scientific project/collaboration

**Types of analyses:** subgroup analyses, biomarker studies

**Mechanisms of data availability:** After submission of material and data access/transfer agreement with investigator support.

**Any additional restrictions:** none
